# Supplementary material for: Ischemic Stroke in Children and Young Adults With Congenital Heart Disease
Source: PubMed Central journal article supplement — J Am Heart Assoc. 2016 Feb 23;5(2):e003071. doi: 10.1161/JAHA.115.003071 (PMC4802444; doi:10.1161/jaha.115.003071), 2016-02-23

## SUPPLEMENTAL MATERIAL

**Figure S1.** Cumulative incidence of ischemic stroke and mortality in overall and Marelli groups of patients with congenital heart disease and controls for up to 42 years of age

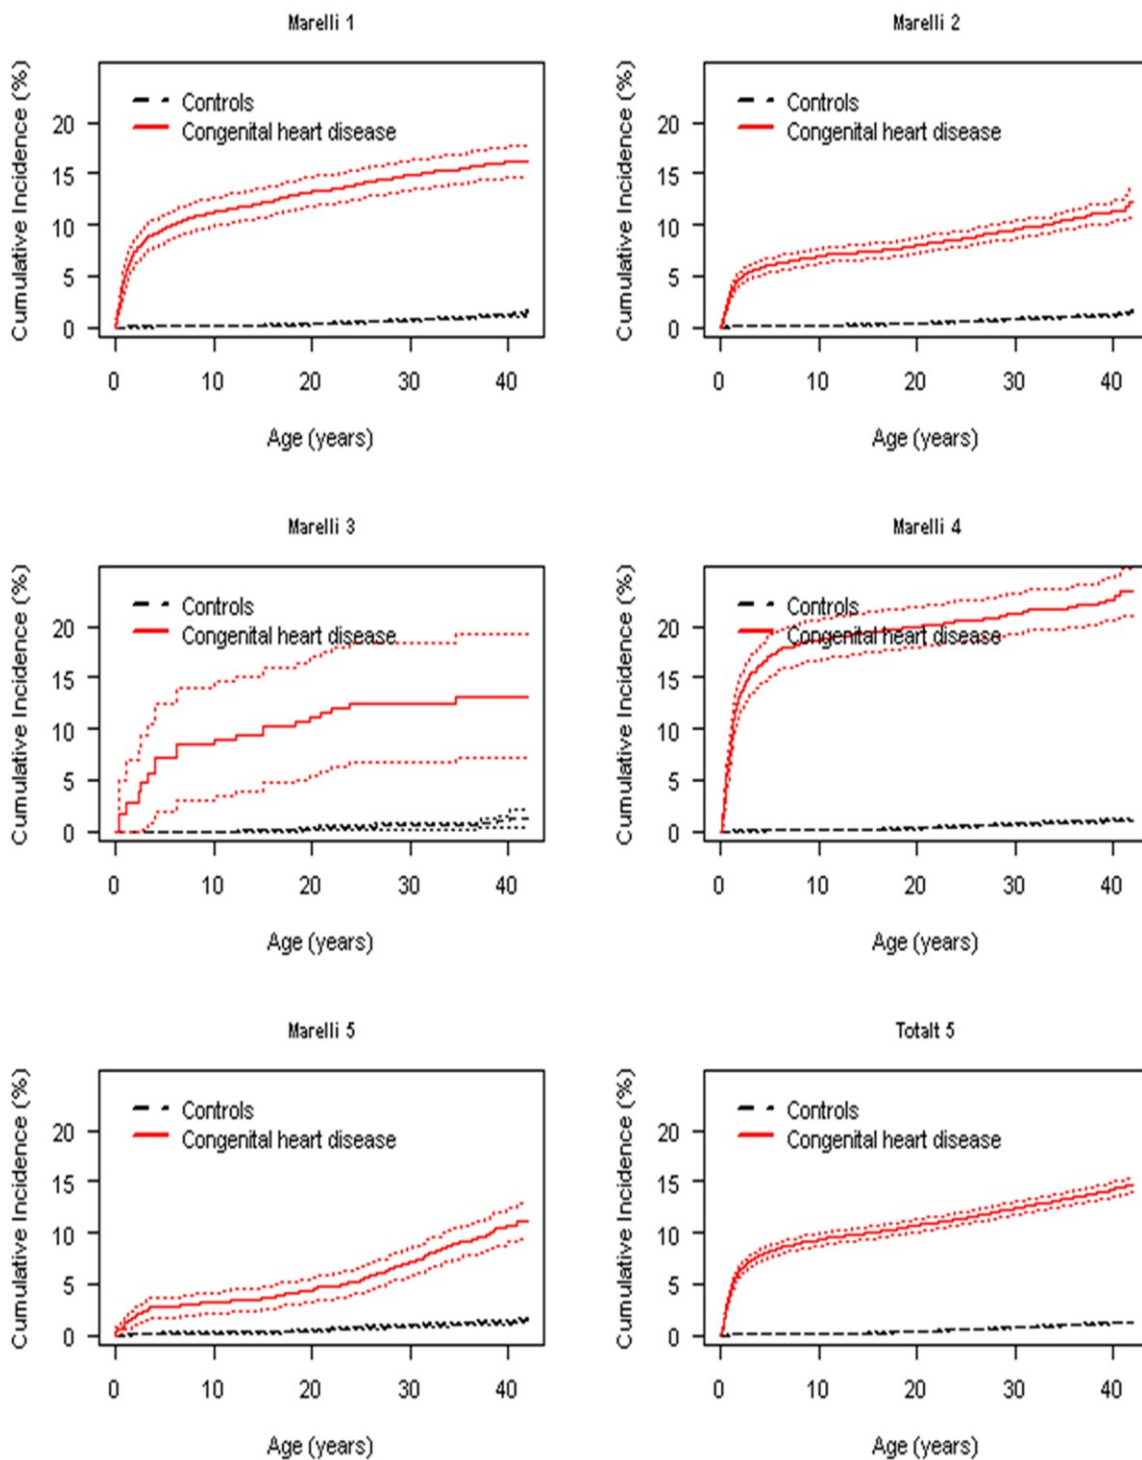

Supplement: JAH3-5-e003071-s001.pdf [file JAH3-5-e003071-s001.pdf]
